# Supplementary material for: Deciphering Machine Learning Decisions to Distinguish between Posterior Fossa Tumor Types Using MRI Features: What Do the Data Tell Us?
Source: MDPI journal article supplement (doi:10.3390/cancers15164015), 2023-08-08
Supplement: s1 [file s1]

## S1: Additional Figures

### Medulloblastoma

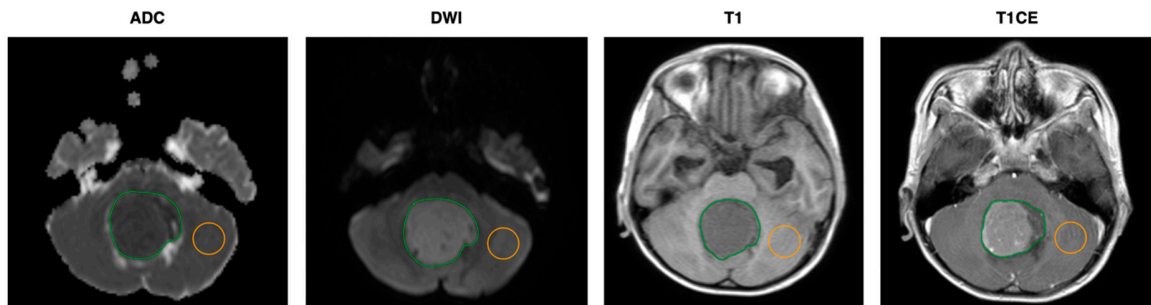

### Ependymoma

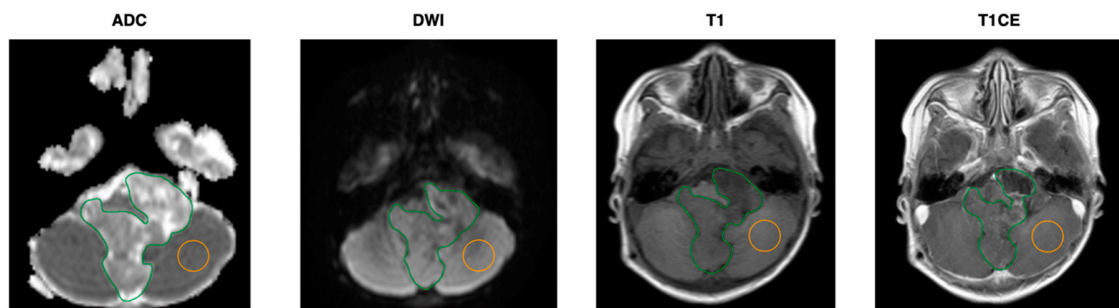

### Pilocytic Astrocytoma

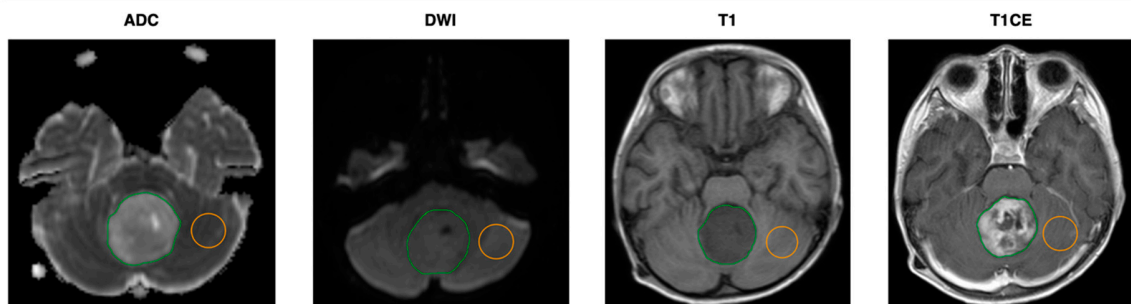

### Brainstem Glioma

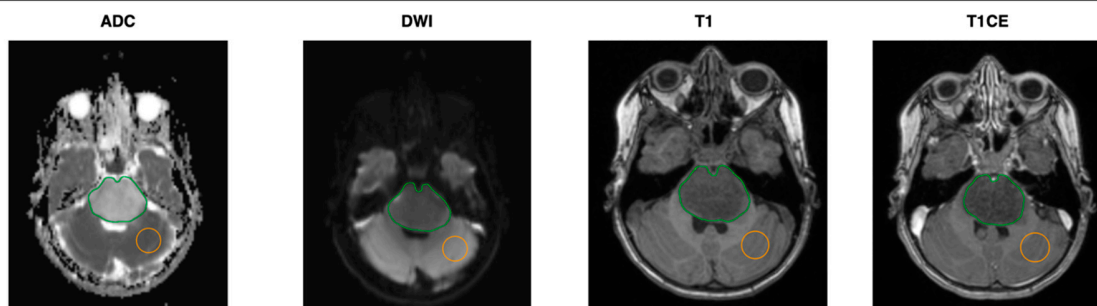

**Figure S1:** Examples of ROI delineations on a ADC, DWI, T1 and T1CE MRI.

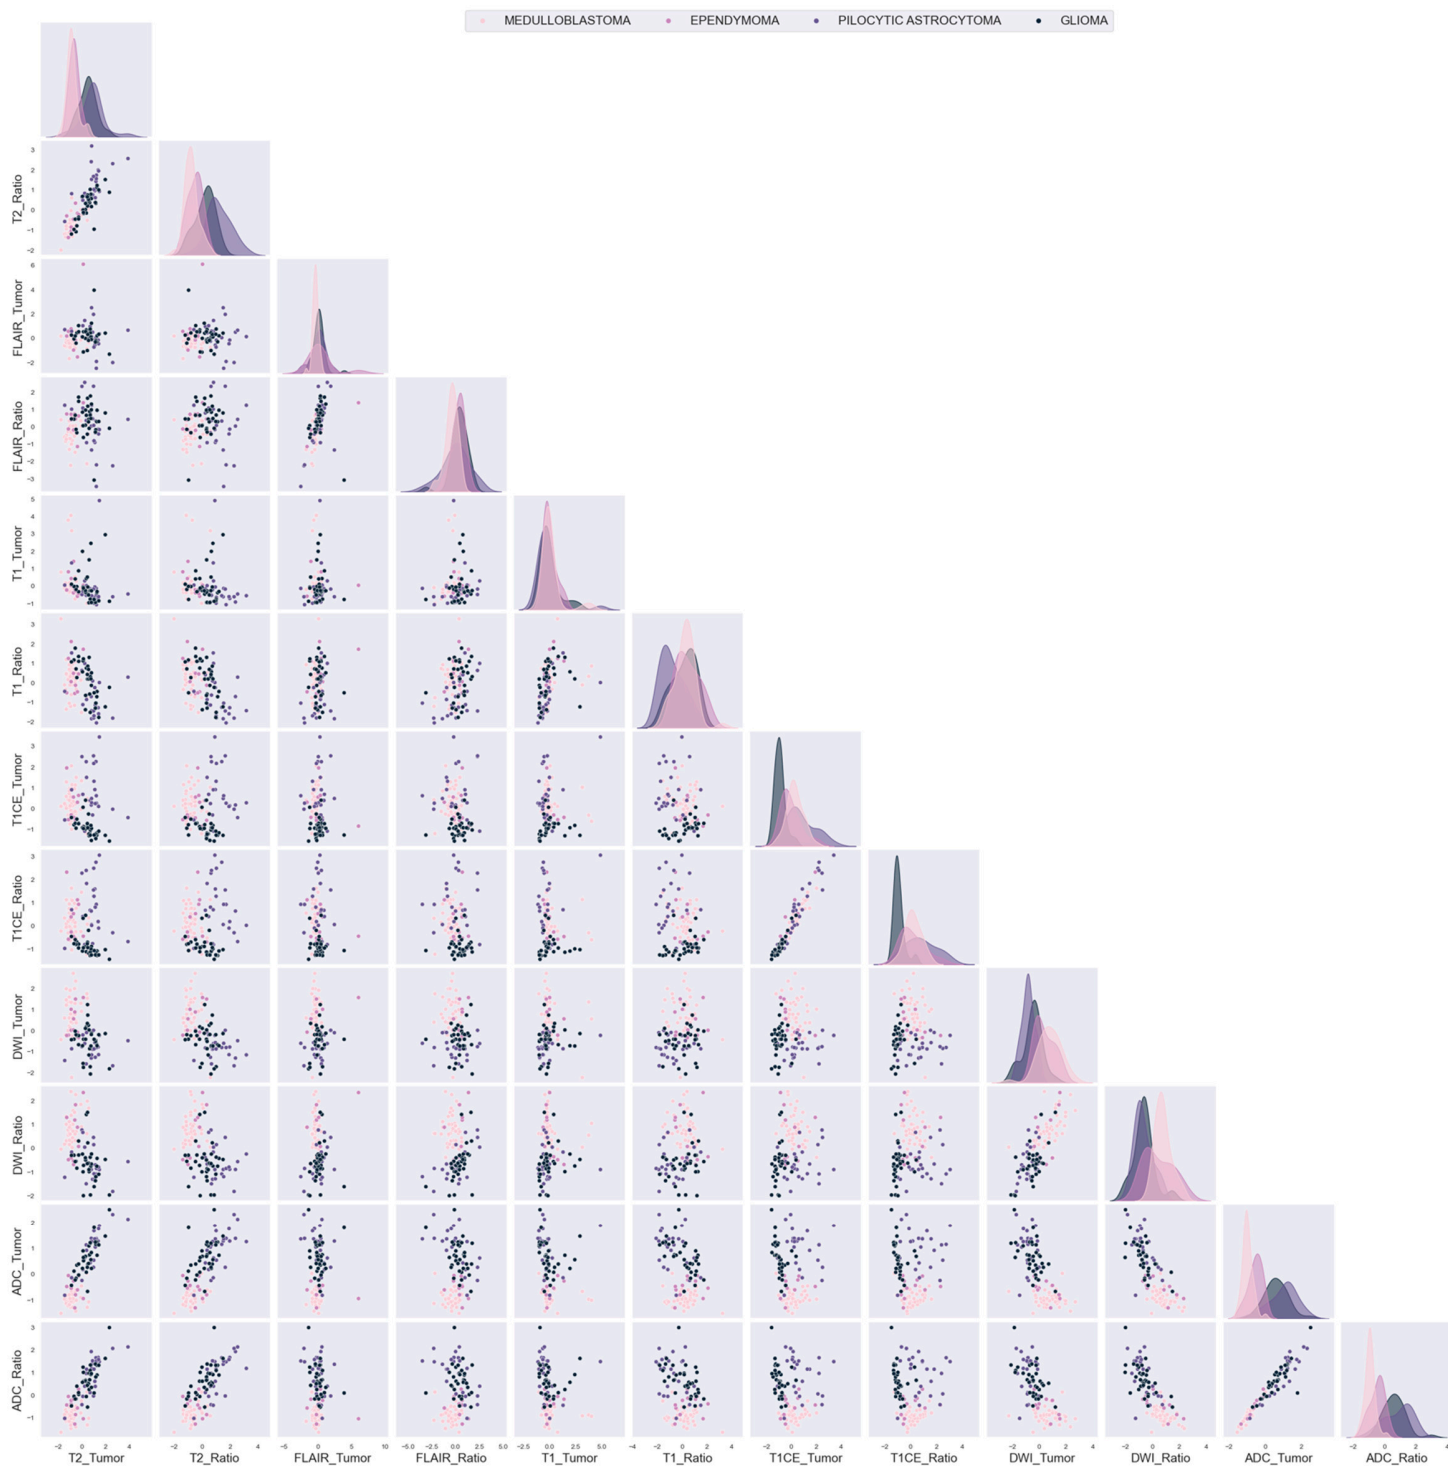

**Figure S2:** Pairwise plot with no parenchymas.

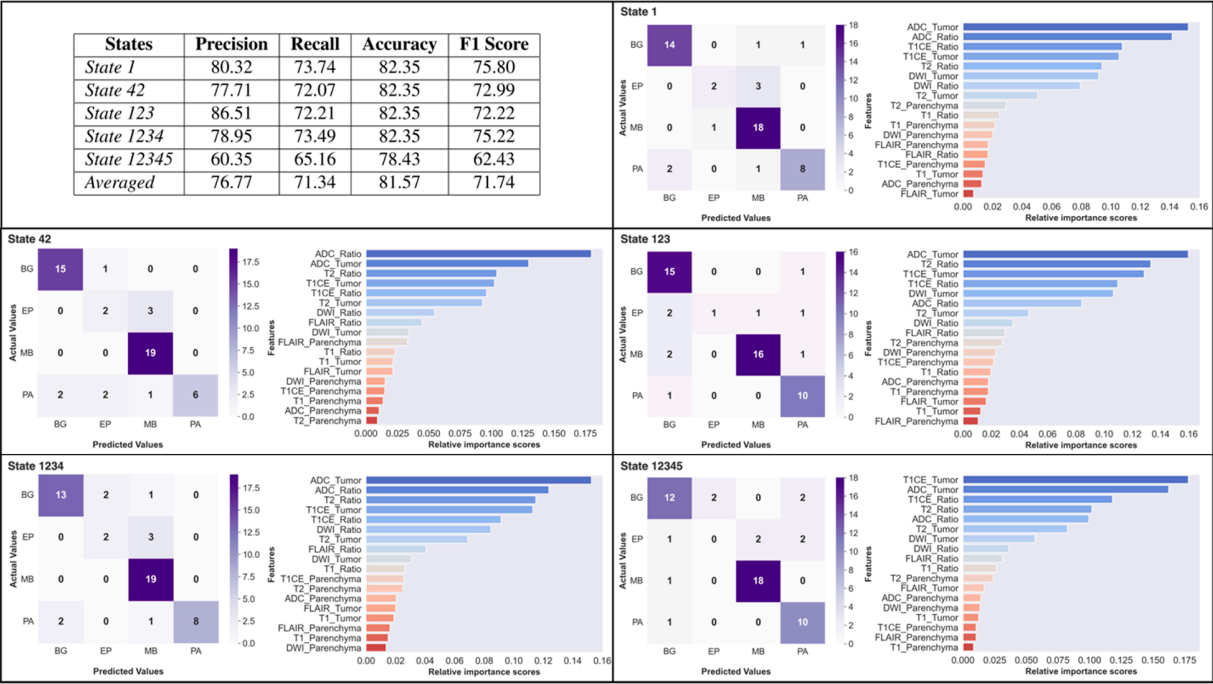

**Figure S3:** RF model analysis of MB, EP, PA, and BG with classification metrics, confusion matrices, and feature importance distributions for each stratified random sampling state.

High quality pdf version of figures can be found at our [GitHub repository](#).

## S2: Differentiation scores of machine learning models for all tumor types.

Table S1. MB-EP

| Models | Precision     | Recall        | Accuracy      | F1_Score      |
|--------|---------------|---------------|---------------|---------------|
| CB     | 70.62 ± 28.33 | 56.00 ± 5.48  | 81.67 ± 2.28  | 54.82 ± 9.70  |
| DT     | 67.36 ± 11.68 | 68.42 ± 13.09 | 73.33 ± 14.01 | 65.63 ± 12.70 |
| GBM    | 64.99 ± 21.04 | 62.63 ± 14.72 | 75.83 ± 9.03  | 61.57 ± 15.21 |
| LR     | 70.65 ± 4.55  | 68.21 ± 7.86  | 80.00 ± 3.49  | 67.70 ± 6.19  |
| LSVM   | 65.93 ± 11.66 | 68.00 ± 13.76 | 75.00 ± 8.84  | 65.33 ± 11.55 |
| RF     | 83.58 ± 12.02 | 62.95 ± 5.43  | 83.33 ± 2.95  | 65.38 ± 6.86  |
| SVM    | 67.48 ± 11.11 | 69.05 ± 11.95 | 76.67 ± 6.97  | 66.47 ± 10.16 |
| XGB    | 70.36 ± 24.08 | 58.84 ± 10.52 | 79.17 ± 7.80  | 60.08 ± 13.52 |

Table S2. MB-PA

| Models | Precision    | Recall       | Accuracy     | F1_Score     |
|--------|--------------|--------------|--------------|--------------|
| CB     | 94.67 ± 4.51 | 94.56 ± 5.94 | 94.84 ± 4.89 | 94.48 ± 5.36 |
| DT     | 92.01 ± 3.19 | 92.46 ± 4.68 | 92.26 ± 3.68 | 91.86 ± 4.04 |
| GBM    | 92.59 ± 2.98 | 92.98 ± 4.78 | 92.90 ± 3.53 | 92.50 ± 3.96 |
| LR     | 96.60 ± 2.47 | 95.61 ± 4.78 | 96.13 ± 3.53 | 95.81 ± 3.98 |
| LSVM   | 97.46 ± 1.57 | 97.28 ± 1.70 | 97.42 ± 1.44 | 97.28 ± 1.52 |
| RF     | 93.90 ± 3.61 | 94.04 ± 5.43 | 94.19 ± 4.21 | 93.81 ± 4.66 |
| SVM    | 94.96 ± 3.07 | 94.25 ± 3.28 | 94.84 ± 2.89 | 94.51 ± 3.10 |
| XGB    | 91.37 ± 5.64 | 89.56 ± 7.47 | 90.97 ± 6.20 | 90.15 ± 6.91 |

**Table S3. MB-BG**

| Models | Precision    | Recall       | Accuracy     | F1_Score     |
|--------|--------------|--------------|--------------|--------------|
| CB     | 94.04 ± 3.61 | 93.42 ± 3.85 | 93.71 ± 3.73 | 93.62 ± 3.81 |
| DT     | 93.59 ± 3.19 | 92.80 ± 3.37 | 93.14 ± 3.26 | 93.03 ± 3.33 |
| GBM    | 94.04 ± 3.61 | 93.42 ± 3.85 | 93.71 ± 3.73 | 93.62 ± 3.81 |
| LR     | 94.94 ± 2.38 | 94.77 ± 2.50 | 94.86 ± 2.39 | 94.81 ± 2.42 |
| LSVM   | 94.47 ± 3.27 | 94.14 ± 3.73 | 94.29 ± 3.50 | 94.21 ± 3.59 |
| RF     | 94.04 ± 3.61 | 93.42 ± 3.85 | 93.71 ± 3.73 | 93.62 ± 3.81 |
| SVM    | 93.39 ± 3.09 | 92.89 ± 3.42 | 93.14 ± 3.26 | 93.05 ± 3.34 |
| XGB    | 94.04 ± 3.61 | 93.42 ± 3.85 | 93.71 ± 3.73 | 93.62 ± 3.81 |

**Table S4. EP-PA**

| Models | Precision    | Recall       | Accuracy      | F1_Score      |
|--------|--------------|--------------|---------------|---------------|
| CB     | 91.45 ± 8.40 | 93.00 ± 6.47 | 91.76 ± 8.92  | 90.94 ± 9.04  |
| DT     | 84.64 ± 9.39 | 89.17 ± 7.57 | 84.71 ± 10.69 | 83.99 ± 10.85 |
| GBM    | 84.64 ± 9.39 | 89.17 ± 7.57 | 84.71 ± 10.69 | 83.99 ± 10.85 |
| LR     | 95.90 ± 4.17 | 96.33 ± 4.11 | 96.47 ± 3.22  | 95.80 ± 3.85  |
| LSVM   | 88.60 ± 7.09 | 91.33 ± 5.16 | 89.41 ± 7.67  | 88.37 ± 7.53  |
| RF     | 92.62 ± 8.64 | 93.83 ± 5.82 | 92.94 ± 7.67  | 92.18 ± 8.15  |
| SVM    | 90.98 ± 7.58 | 91.83 ± 5.93 | 91.76 ± 6.71  | 90.58 ± 7.21  |
| XGB    | 83.81 ± 9.69 | 86.33 ± 7.21 | 82.35 ± 11.76 | 81.48 ± 11.35 |

**Table S5. EP-BG**

| Models | Precision     | Recall        | Accuracy     | F1_Score      |
|--------|---------------|---------------|--------------|---------------|
| CB     | 76.68 ± 11.87 | 73.75 ± 9.51  | 80.95 ± 6.73 | 73.34 ± 8.76  |
| DT     | 76.88 ± 12.74 | 77.12 ± 12.45 | 81.90 ± 8.52 | 75.56 ± 12.02 |
| GBM    | 77.21 ± 12.86 | 75.75 ± 11.90 | 81.90 ± 8.52 | 75.02 ± 11.74 |
| LR     | 91.46 ± 7.58  | 87.50 ± 10.94 | 91.43 ± 6.21 | 87.48 ± 9.73  |
| LSVM   | 84.88 ± 9.44  | 87.00 ± 12.25 | 88.57 ± 7.22 | 84.51 ± 11.02 |
| RF     | 71.62 ± 21.29 | 71.62 ± 14.83 | 81.90 ± 6.21 | 69.96 ± 16.64 |
| SVM    | 85.82 ± 5.24  | 84.25 ± 8.77  | 88.57 ± 2.61 | 83.76 ± 4.79  |
| XGB    | 76.68 ± 11.87 | 73.75 ± 9.51  | 80.95 ± 6.73 | 73.34 ± 8.76  |

**Table S6.** PA-BG

| <b>Models</b> | <b>Precision</b> | <b>Recall</b> | <b>Accuracy</b> | <b>F1_Score</b> |
|---------------|------------------|---------------|-----------------|-----------------|
| <b>CB</b>     | 89.95 ± 5.97     | 88.69 ± 6.86  | 89.63 ± 6.09    | 89.04 ± 6.50    |
| <b>DT</b>     | 81.00 ± 5.36     | 78.92 ± 5.12  | 80.74 ± 4.83    | 79.48 ± 5.12    |
| <b>GBM</b>    | 79.45 ± 6.44     | 77.67 ± 5.50  | 79.26 ± 5.62    | 78.08 ± 5.67    |
| <b>LR</b>     | 84.07 ± 3.44     | 84.32 ± 2.77  | 84.44 ± 3.10    | 84.02 ± 3.05    |
| <b>LSVM</b>   | 82.75 ± 3.54     | 82.50 ± 2.62  | 82.96 ± 3.31    | 82.40 ± 3.12    |
| <b>RF</b>     | 89.38 ± 6.26     | 86.59 ± 7.56  | 88.15 ± 6.63    | 87.25 ± 7.15    |
| <b>SVM</b>    | 84.40 ± 4.28     | 83.75 ± 3.42  | 84.44 ± 4.06    | 83.85 ± 3.92    |
| <b>XGB</b>    | 90.41 ± 5.04     | 88.41 ± 5.24  | 89.63 ± 4.83    | 89.01 ± 5.19    |

**Table S7.** MB-EP-PA-BG

| <b>Models</b> | <b>Precision</b> | <b>Recall</b> | <b>Accuracy</b> | <b>F1_Score</b> |
|---------------|------------------|---------------|-----------------|-----------------|
| <b>CB</b>     | 72.60 ± 9.38     | 68.82 ± 4.65  | 79.22 ± 2.97    | 69.31 ± 5.93    |
| <b>DT</b>     | 70.54 ± 8.88     | 67.41 ± 4.85  | 76.86 ± 3.77    | 67.90 ± 6.37    |
| <b>GBM</b>    | 62.98 ± 5.09     | 60.60 ± 2.59  | 71.76 ± 3.28    | 60.86 ± 2.99    |
| <b>LR</b>     | 74.21 ± 11.20    | 67.98 ± 3.74  | 79.22 ± 3.28    | 68.03 ± 4.74    |
| <b>LSVM</b>   | 66.61 ± 9.53     | 65.68 ± 2.74  | 77.25 ± 1.75    | 64.56 ± 4.14    |
| <b>RF</b>     | 76.77 ± 9.78     | 71.34 ± 3.53  | 81.57 ± 1.75    | 71.74 ± 5.41    |
| <b>SVM</b>    | 70.05 ± 6.38     | 64.94 ± 2.38  | 74.51 ± 2.77    | 65.21 ± 2.26    |
| <b>XGB</b>    | 69.45 ± 3.09     | 67.29 ± 2.94  | 76.47 ± 2.40    | 67.28 ± 3.13    |
